# Supplementary material for: Examining interactions between polygenic scores and interpersonal trauma exposure on alcohol consumption and use disorder in an ancestrally diverse college cohort
Source: PubMed Central journal article supplement (PMC10868390; doi:10.3389/fgene.2023.1274381), 2024-02-01
Supplement: DataSheet1.pdf [file DataSheet1.pdf]

**Supplemental Table 1. Phenotypic-only Regression Results for Biological Sex, IPT, and Interactions Between them for Alcohol Use Behaviors.**

| Variable                               | $\beta$       | Standard Error | Odds Ratio [95% CI]       | p-value                      |
|----------------------------------------|---------------|----------------|---------------------------|------------------------------|
| <b><i>Alcohol Consumption</i></b>      |               |                |                           |                              |
| <b>Sex</b>                             |               |                |                           |                              |
| Male                                   | Reference     |                |                           |                              |
| Female                                 | <b>-0.377</b> | <b>0.063</b>   | <b>0.686</b> [0.61, 0.78] | <b>1.93×10<sup>-9</sup></b>  |
| <b>IPT Exposure</b>                    |               |                |                           |                              |
| No exposure                            | Reference     |                |                           |                              |
| IPT Exposure                           | <b>0.385</b>  | <b>0.087</b>   | <b>1.470</b> [1.24, 1.74] | <b>9.42×10<sup>-6</sup></b>  |
| Sex by IPT Exposure                    | 0.137         | 0.107          | 1.147 [0.93, 1.41]        | 0.199                        |
| <br><b><i>Alcohol Use Disorder</i></b> |               |                |                           |                              |
| <b>Sex</b>                             |               |                |                           |                              |
| Male                                   | Reference     |                |                           |                              |
| Female                                 | -0.059        | 0.062          | 0.943 [0.84, 1.06]        | 0.340                        |
| <b>IPT Exposure</b>                    |               |                |                           |                              |
| No exposure                            | Reference     |                |                           |                              |
| IPT Exposure                           | <b>0.544</b>  | <b>0.080</b>   | <b>1.722</b> [1.47, 2.01] | <b>1.04×10<sup>-11</sup></b> |
| Sex by IPT Exposure                    | -0.005        | 0.099          | 0.995 [0.82, 1.21]        | 0.959                        |

*Note: IPT = interpersonal trauma, bolded estimates are significant at p < 0.05.*

**Supplemental Table 2. Meta-Analysis of Regression Coefficients for Biological Sex, IPT, PGS, and Interactions Between them for Alcohol Use Behaviors Based on Random Effect Model.**

| Variable                               | $\beta$       | Standard Error | p-value                                 |
|----------------------------------------|---------------|----------------|-----------------------------------------|
| <b><i>Alcohol Consumption</i></b>      |               |                |                                         |
| <b>Sex</b>                             |               |                |                                         |
| Male                                   | Reference     |                |                                         |
| Female                                 | <b>-0.304</b> | <b>0.084</b>   | <b><math>3.97 \times 10^{-3}</math></b> |
| <b>IPT Exposure</b>                    |               |                |                                         |
| No exposure                            | Reference     |                |                                         |
| IPT Exposure                           | <b>0.320</b>  | <b>0.133</b>   | <b><math>1.63 \times 10^{-2}</math></b> |
| Sex by IPT Exposure                    | 0.136         | 0.104          | 0.193                                   |
| <b>PGS</b>                             |               |                |                                         |
| PGS                                    | <b>0.086</b>  | <b>0.030</b>   | <b><math>3.97 \times 10^{-3}</math></b> |
| PGS by IPT Exposure                    | -0.047        | 0.049          | 0.333                                   |
| <br><b><i>Alcohol Use Disorder</i></b> |               |                |                                         |
| <b>Sex</b>                             |               |                |                                         |
| Male                                   | Reference     |                |                                         |
| Female                                 | 0.007         | 0.019          | 0.723                                   |
| <b>IPT Exposure</b>                    |               |                |                                         |
| No exposure                            | Reference     |                |                                         |
| IPT Exposure                           | <b>0.132</b>  | <b>0.038</b>   | <b><math>5.00 \times 10^{-4}</math></b> |
| Sex by IPT Exposure                    | -0.003        | 0.031          | 0.919                                   |
| <b>PGS</b>                             |               |                |                                         |
| PGS                                    | <b>0.019</b>  | <b>0.006</b>   | <b><math>1.16 \times 10^{-3}</math></b> |
| PGS by IPT Exposure                    | -0.008        | 0.011          | 0.475                                   |

*Note: IPT = interpersonal trauma, PGS = polygenic score, bolded estimates are significant at  $p < 0.05$ .*

**Supplemental Table 3. Regression Coefficients for Biological Sex, IPT, PGS, and Interactions Between them for Alcohol Use Behaviors Based on Fixed Effect Model Across Ancestries.**

|                                   | EUR<br>N = 4331            | AFR<br>N = 1915            | AMR<br>N = 1126            | EAS<br>N = 862             | SAS<br>N = 772 | META<br>N = 9006 |
|-----------------------------------|----------------------------|----------------------------|----------------------------|----------------------------|----------------|------------------|
| <b><i>Alcohol Consumption</i></b> |                            |                            |                            |                            |                |                  |
| <b>PC1</b>                        |                            |                            |                            |                            |                |                  |
| β                                 | 0.188                      | -0.258                     | 0.333                      | -0.385                     | 0.223          | 0.044            |
| Standard Error                    | 0.034                      | 0.051                      | 0.087                      | 0.079                      | 0.092          | 0.024            |
| p-value                           | <b>2.8×10<sup>-8</sup></b> | <b>4.1×10<sup>-7</sup></b> | <b>1.3×10<sup>-4</sup></b> | <b>1.4×10<sup>-6</sup></b> | <b>0.016</b>   | 0.074            |
| <b>PC2</b>                        |                            |                            |                            |                            |                |                  |
| β                                 | 0.071                      | 0.087                      | 0.069                      | 0.130                      | -0.070         | 0.070            |
| Standard Error                    | 0.033                      | 0.051                      | 0.070                      | 0.079                      | 0.092          | 0.024            |
| p-value                           | <b>0.032</b>               | 0.086                      | 0.328                      | 0.099                      | 0.443          | <b>0.003</b>     |
| <b>PC3</b>                        |                            |                            |                            |                            |                |                  |
| β                                 | 0.005                      | 0.012                      | -0.068                     | 0.229                      | 0.071          | 0.023            |
| Standard Error                    | 0.034                      | 0.051                      | 0.069                      | 0.078                      | 0.093          | 0.024            |
| p-value                           | 0.892                      | 0.809                      | 0.324                      | <b>0.004</b>               | 0.448          | 0.338            |
| <b>PC4</b>                        |                            |                            |                            |                            |                |                  |
| β                                 | -0.024                     | 0.005                      | 0.275                      | 0.104                      | -0.131         | 0.001            |
| Standard Error                    | 0.033                      | 0.051                      | 0.113                      | 0.078                      | 0.092          | 0.024            |
| p-value                           | 0.458                      | 0.925                      | <b>0.015</b>               | 0.185                      | 0.153          | 0.952            |
| <b>PC5</b>                        |                            |                            |                            |                            |                |                  |
| β                                 | 0.074                      | -0.045                     | -0.020                     | -0.054                     | -0.096         | 0.014            |
| Standard Error                    | 0.034                      | 0.051                      | 0.077                      | 0.078                      | 0.092          | 0.024            |
| p-value                           | <b>0.028</b>               | 0.374                      | 0.789                      | 0.492                      | 0.295          | 0.560            |
| <b>PC6</b>                        |                            |                            |                            |                            |                |                  |
| β                                 | 0.001                      | -0.006                     | 0.214                      | -0.104                     | 0.042          | 0.005            |
| Standard Error                    | 0.035                      | 0.051                      | 0.099                      | 0.079                      | 0.092          | 0.025            |
| p-value                           | 0.972                      | 0.898                      | <b>0.031</b>               | 0.188                      | 0.647          | 0.829            |
| <b>PC7</b>                        |                            |                            |                            |                            |                |                  |
| β                                 | 0.018                      | 0.015                      | -0.172                     | -0.069                     | -0.043         | -0.008           |
| Standard Error                    | 0.035                      | 0.051                      | 0.095                      | 0.081                      | 0.093          | 0.025            |
| p-value                           | 0.607                      | 0.765                      | 0.070                      | 0.400                      | 0.644          | 0.735            |
| <b>PC8</b>                        |                            |                            |                            |                            |                |                  |
| β                                 | 0.073                      | 0.021                      | -0.082                     | 0.082                      | 0.005          | 0.037            |
| Standard Error                    | 0.037                      | 0.051                      | 0.072                      | 0.078                      | 0.092          | 0.025            |

|                                                                |                      |              |                      |                      |                      |                             |
|----------------------------------------------------------------|----------------------|--------------|----------------------|----------------------|----------------------|-----------------------------|
| <i>p</i> -value                                                | 0.052                | 0.679        | 0.257                | 0.295                | 0.953                | 0.141                       |
| <b>PC9</b>                                                     |                      |              |                      |                      |                      |                             |
| $\beta$                                                        | -0.011               | 0.023        | -0.066               | 0.016                | -0.038               | -0.010                      |
| Standard Error                                                 | 0.033                | 0.051        | 0.069                | 0.080                | 0.093                | 0.024                       |
| <i>p</i> -value                                                | 0.731                | 0.644        | 0.341                | 0.845                | 0.684                | 0.687                       |
| <b>PC10</b>                                                    |                      |              |                      |                      |                      |                             |
| $\beta$                                                        | 0.014                | -0.088       | -0.041               | 0.083                | 0.055                | -0.005                      |
| Standard Error                                                 | 0.033                | 0.051        | 0.069                | 0.078                | 0.092                | 0.024                       |
| <i>p</i> -value                                                | 0.662                | 0.083        | 0.552                | 0.292                | 0.547                | 0.822                       |
| <b>Sex<sub>Female</sub></b>                                    |                      |              |                      |                      |                      |                             |
| $\beta$                                                        | -0.280               | -0.404       | -0.408               | 0.087                | -0.535               | -0.300                      |
| Standard Error                                                 | 0.086                | 0.141        | 0.179                | 0.191                | 0.220                | 0.061                       |
| <i>p</i> -value                                                | <b>0.001</b>         | <b>0.004</b> | <b>0.023</b>         | 0.649                | <b>0.052</b>         | <b>1.02×10<sup>-6</sup></b> |
| Partial R <sup>2</sup>                                         | 0.004                | 0.004        | 0.008                | 0.002                | 0.008                |                             |
| <b>IPT Exposure<sub>Yes</sub></b>                              |                      |              |                      |                      |                      |                             |
| $\beta$                                                        | 0.347                | -0.120       | 0.577                | 0.246                | 0.725                | 0.313                       |
| Standard Error                                                 | 0.113                | 0.205        | 0.249                | 0.300                | 0.313                | 0.085                       |
| <i>p</i> -value                                                | <b>0.002</b>         | 0.557        | <b>0.021</b>         | 0.413                | <b>0.021</b>         | <b>2.13×10<sup>-4</sup></b> |
| Partial R <sup>2</sup>                                         | 0.006                | 0.007        | 0.012                | 0.007                | 0.022                |                             |
| <b>Sex<sub>Female</sub> by IPT Exposure<sub>Yes</sub></b>      |                      |              |                      |                      |                      |                             |
| $\beta$                                                        | 0.019                | 0.523        | -0.081               | 0.265                | 0.222                | 0.136                       |
| Standard Error                                                 | 0.141                | 0.239        | 0.303                | 0.369                | 0.410                | 0.104                       |
| <i>p</i> -value                                                | 0.895                | <b>0.029</b> | 0.788                | 0.473                | 0.589                | 0.193                       |
| Partial R <sup>2</sup>                                         | 3.9×10 <sup>-6</sup> | 0.002        | 6.2×10 <sup>-5</sup> | 5.8×10 <sup>-4</sup> | 3.7×10 <sup>-4</sup> |                             |
| <b>PGS<sub>consumption</sub></b>                               |                      |              |                      |                      |                      |                             |
| $\beta$                                                        | 0.086                | 0.093        | 0.121                | 0.023                | 0.107                | 0.086                       |
| Standard Error                                                 | 0.043                | 0.063        | 0.090                | 0.092                | 0.112                | 0.030                       |
| <i>p</i> -value                                                | <b>0.045</b>         | 0.144        | 0.178                | 0.806                | 0.338                | <b>3.97×10<sup>-3</sup></b> |
| Partial R <sup>2</sup>                                         | 0.001                | 0.001        | 0.002                | 7.8×10 <sup>-4</sup> | 0.002                |                             |
| <b>PGS<sub>consumption</sub> by IPT Exposure<sub>Yes</sub></b> |                      |              |                      |                      |                      |                             |
| $\beta$                                                        | -0.041               | -0.146       | -0.019               | 0.098                | 0.004                | -0.047                      |
| Standard Error                                                 | 0.067                | 0.106        | 0.140                | 0.176                | 0.201                | 0.049                       |
| <i>p</i> -value                                                | 0.544                | 0.166        | 0.895                | 0.578                | 0.982                | 0.333                       |
| Partial R <sup>2</sup>                                         | 8.3×10 <sup>-5</sup> | 0.001        | 1.5×10 <sup>-5</sup> | 3.4×10 <sup>-4</sup> | 6.3×10 <sup>-7</sup> |                             |

### **Alcohol Use Disorder**

|                 |                                        |                      |                      |                                        |                      |              |
|-----------------|----------------------------------------|----------------------|----------------------|----------------------------------------|----------------------|--------------|
| <b>PC1</b>      |                                        |                      |                      |                                        |                      |              |
| $\beta$         | 0.033                                  | -0.029               | 0.001                | -0.043                                 | 0.008                | 0.006        |
| Standard Error  | 0.006                                  | 0.009                | 0.020                | 0.013                                  | 0.016                | 0.004        |
| <i>p</i> -value | <b><math>8.9 \times 10^{-8}</math></b> | <b>0.002</b>         | 0.947                | <b><math>7.4 \times 10^{-4}</math></b> | 0.601                | 0.155        |
| <b>PC2</b>      |                                        |                      |                      |                                        |                      |              |
| $\beta$         | 0.006                                  | -0.001               | 0.007                | 0.014                                  | -0.017               | 0.003        |
| Standard Error  | 0.007                                  | 0.009                | 0.016                | 0.013                                  | 0.017                | 0.004        |
| <i>p</i> -value | 0.410                                  | 0.885                | 0.668                | 0.276                                  | 0.295                | 0.481        |
| <b>PC3</b>      |                                        |                      |                      |                                        |                      |              |
| $\beta$         | -0.008                                 | 0.010                | $7.4 \times 10^{-4}$ | -0.005                                 | -0.015               | -0.003       |
| Standard Error  | 0.008                                  | 0.011                | 0.016                | 0.016                                  | 0.016                | 0.005        |
| <i>p</i> -value | 0.320                                  | 0.334                | 0.964                | 0.778                                  | 0.362                | 0.574        |
| <b>PC4</b>      |                                        |                      |                      |                                        |                      |              |
| $\beta$         | 0.008                                  | $1.8 \times 10^{-4}$ | 0.018                | 0.021                                  | 0.008                | 0.008        |
| Standard Error  | 0.006                                  | 0.009                | 0.026                | 0.016                                  | 0.018                | 0.005        |
| <i>p</i> -value | 0.186                                  | 0.984                | 0.490                | 0.188                                  | 0.648                | 0.104        |
| <b>PC5</b>      |                                        |                      |                      |                                        |                      |              |
| $\beta$         | 0.015                                  | 0.016                | -0.017               | -0.004                                 | -0.003               | 0.005        |
| Standard Error  | 0.005                                  | 0.011                | 0.015                | 0.005                                  | 0.018                | 0.003        |
| <i>p</i> -value | <b>0.003</b>                           | 0.156                | 0.282                | 0.444                                  | 0.861                | 0.137        |
| <b>PC6</b>      |                                        |                      |                      |                                        |                      |              |
| $\beta$         | -0.017                                 | -0.011               | 0.029                | 0.007                                  | 0.024                | -0.001       |
| Standard Error  | 0.009                                  | 0.010                | 0.023                | 0.007                                  | 0.018                | 0.004        |
| <i>p</i> -value | 0.046                                  | 0.295                | 0.198                | 0.334                                  | 0.186                | 0.776        |
| <b>PC7</b>      |                                        |                      |                      |                                        |                      |              |
| $\beta$         | -0.002                                 | -0.003               | -0.013               | 0.001                                  | 0.002                | -0.002       |
| Standard Error  | 0.008                                  | 0.011                | 0.022                | 0.014                                  | 0.017                | 0.005        |
| <i>p</i> -value | 0.787                                  | 0.774                | 0.545                | 0.934                                  | 0.887                | 0.695        |
| <b>PC8</b>      |                                        |                      |                      |                                        |                      |              |
| $\beta$         | 0.010                                  | -0.008               | 0.018                | 0.016                                  | $4.9 \times 10^{-4}$ | 0.006        |
| Standard Error  | 0.008                                  | 0.010                | 0.017                | 0.014                                  | 0.017                | 0.005        |
| <i>p</i> -value | 0.213                                  | 0.453                | 0.277                | 0.268                                  | 0.977                | 0.237        |
| <b>PC9</b>      |                                        |                      |                      |                                        |                      |              |
| $\beta$         | -0.002                                 | 0.007                | 0.011                | 0.022                                  | 0.004                | 0.009        |
| Standard Error  | 0.007                                  | 0.011                | 0.016                | 0.007                                  | 0.016                | 0.004        |
| <i>p</i> -value | 0.799                                  | 0.536                | 0.508                | <b>0.002</b>                           | 0.811                | <b>0.030</b> |
| <b>PC10</b>     |                                        |                      |                      |                                        |                      |              |
| $\beta$         | -0.004                                 | 0.001                | 0.005                | -0.006                                 | 0.018                | -0.001       |

|                                                           |                             |                       |                       |                       |                             |                             |
|-----------------------------------------------------------|-----------------------------|-----------------------|-----------------------|-----------------------|-----------------------------|-----------------------------|
| Standard Error                                            | 0.008                       | 0.010                 | 0.016                 | 0.010                 | 0.020                       | 0.005                       |
| <i>p</i> -value                                           | 0.600                       | 0.888                 | 0.737                 | 0.563                 | 0.370                       | 0.832                       |
| <b>Sex<sub>Female</sub></b>                               |                             |                       |                       |                       |                             |                             |
| $\beta$                                                   | -0.023                      | -0.002                | -0.037                | 0.018                 | 0.088                       | 0.002                       |
| Standard Error                                            | 0.019                       | 0.027                 | 0.038                 | 0.025                 | 0.034                       | 0.012                       |
| <i>p</i> -value                                           | 0.228                       | 0.939                 | 0.338                 | 0.477                 | <b>0.01</b>                 | 0.880                       |
| Partial R <sup>2</sup>                                    | 9.3×10 <sup>-5</sup>        | 1.5×10 <sup>-4</sup>  | 0.002                 | 4.7×10 <sup>-5</sup>  | 0.003                       |                             |
| <b>IPT Exposure<sub>Yes</sub></b>                         |                             |                       |                       |                       |                             |                             |
| $\beta$                                                   | 0.091                       | 0.042                 | 0.132                 | 0.166                 | 0.295                       | 0.110                       |
| Standard Error                                            | 0.028                       | 0.043                 | 0.061                 | 0.068                 | 0.066                       | 0.020                       |
| <i>p</i> -value                                           | <b>1.26×10<sup>-3</sup></b> | 0.322                 | <b>0.03</b>           | <b>0.015</b>          | <b>8.72×10<sup>-6</sup></b> | <b>3.50×10<sup>-8</sup></b> |
| Partial R <sup>2</sup>                                    | 0.011                       | 0.006                 | 0.01                  | 0.015                 | 0.036                       |                             |
| <b>Sex<sub>Female</sub> by IPT Exposure<sub>Yes</sub></b> |                             |                       |                       |                       |                             |                             |
| $\beta$                                                   | 0.037                       | 0.047                 | -0.032                | -0.054                | -0.155                      | 0.008                       |
| Standard Error                                            | 0.035                       | 0.050                 | 0.072                 | 0.080                 | 0.087                       | 0.024                       |
| <i>p</i> -value                                           | 0.281                       | 0.354                 | 0.657                 | 0.501                 | 0.075                       | 0.727                       |
| Partial R <sup>2</sup>                                    | 2.66×10 <sup>-4</sup>       | 4.32×10 <sup>-4</sup> | 1.77×10 <sup>-4</sup> | 5.38×10 <sup>-4</sup> | 4.63×10 <sup>-3</sup>       |                             |
| <b>PGS<sub>AUD</sub></b>                                  |                             |                       |                       |                       |                             |                             |
| $\beta$                                                   | 0.022                       | 0.022                 | -0.0002               | 0.015                 | 0.023                       | 0.019                       |
| Standard Error                                            | 0.010                       | 0.012                 | 0.020                 | 0.013                 | 0.016                       | 0.006                       |
| <i>p</i> -value                                           | <b>2.17×10<sup>-2</sup></b> | 0.070                 | 0.992                 | 0.256                 | 0.169                       | <b>1.17×10<sup>-3</sup></b> |
| Partial R <sup>2</sup>                                    | 0.001                       | 0.002                 | 1.5×10 <sup>-5</sup>  | 0.001                 | 0.001                       |                             |
| <b>PGS<sub>AUD</sub> by IPT Exposure<sub>Yes</sub></b>    |                             |                       |                       |                       |                             |                             |
| $\beta$                                                   | -0.007                      | -0.008                | -0.005                | -0.017                | -0.007                      | -0.008                      |
| Standard Error                                            | 0.016                       | 0.022                 | 0.033                 | 0.037                 | 0.044                       | 0.011                       |
| <i>p</i> -value                                           | 0.663                       | 0.715                 | 0.877                 | 0.649                 | 0.878                       | 0.475                       |
| Partial R <sup>2</sup>                                    | 4.4×10 <sup>-5</sup>        | 6.3×10 <sup>-5</sup>  | 2.7×10 <sup>-5</sup>  | 2.2×10 <sup>-4</sup>  | 7.6×10 <sup>-5</sup>        |                             |

Note: IPT = interpersonal trauma, PGS = polygenic score, *bolded estimates are significant at p < 0.05.*

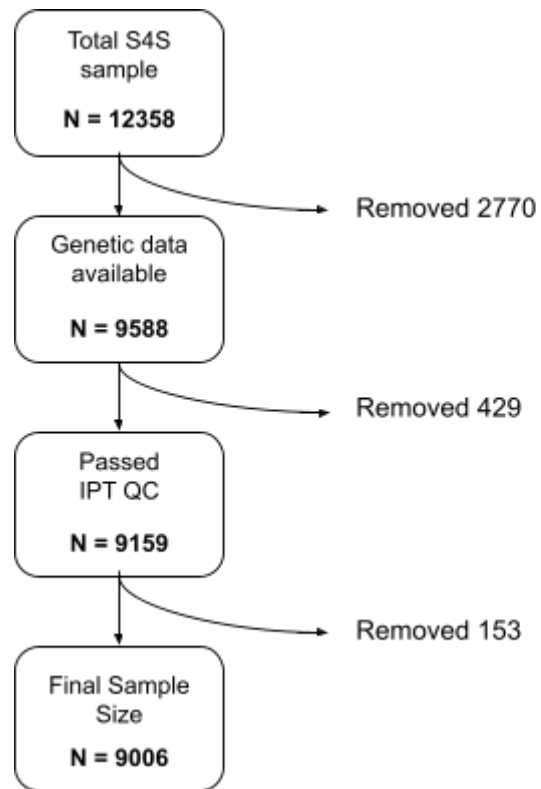

**Supplemental Figure 1: Study Sample Size.** Flow chart showing sample sizes at each quality control step.

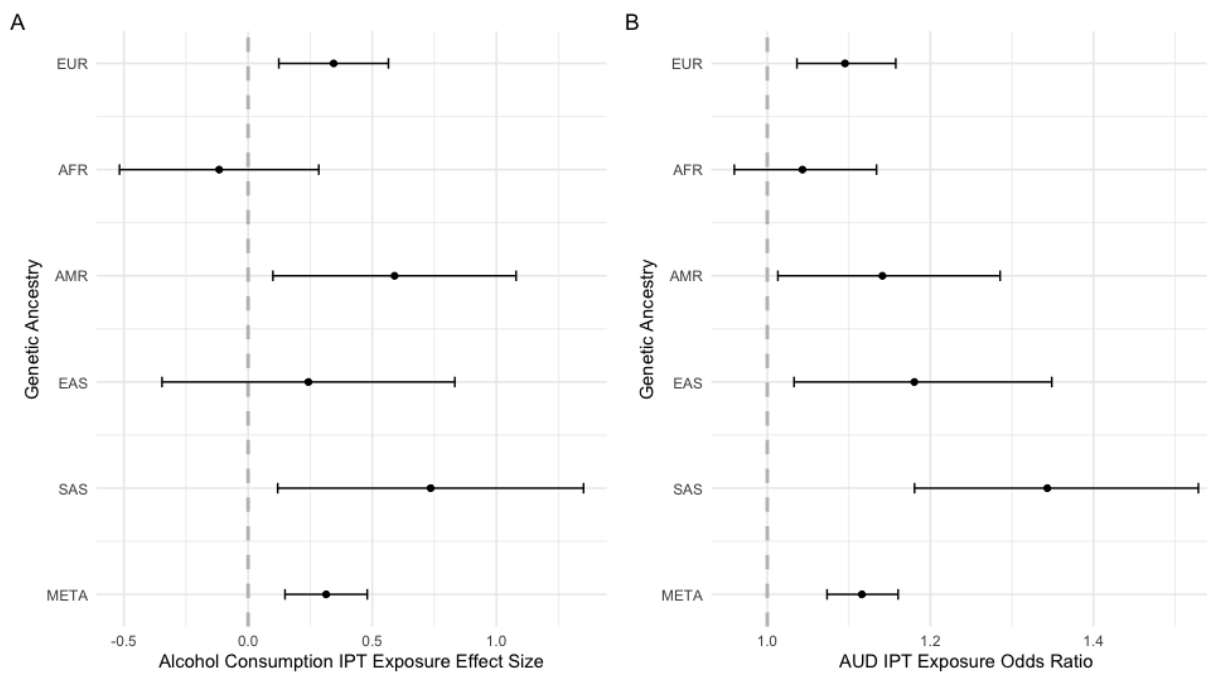

**Supplemental Figure 2: Effect of IPT Exposure on Alcohol Behaviors Across Ancestries.** Forest plots showing the interpersonal trauma (IPT) effect on A) alcohol consumption and B) alcohol use disorder (AUD) across ancestries and meta-analyzed (META).



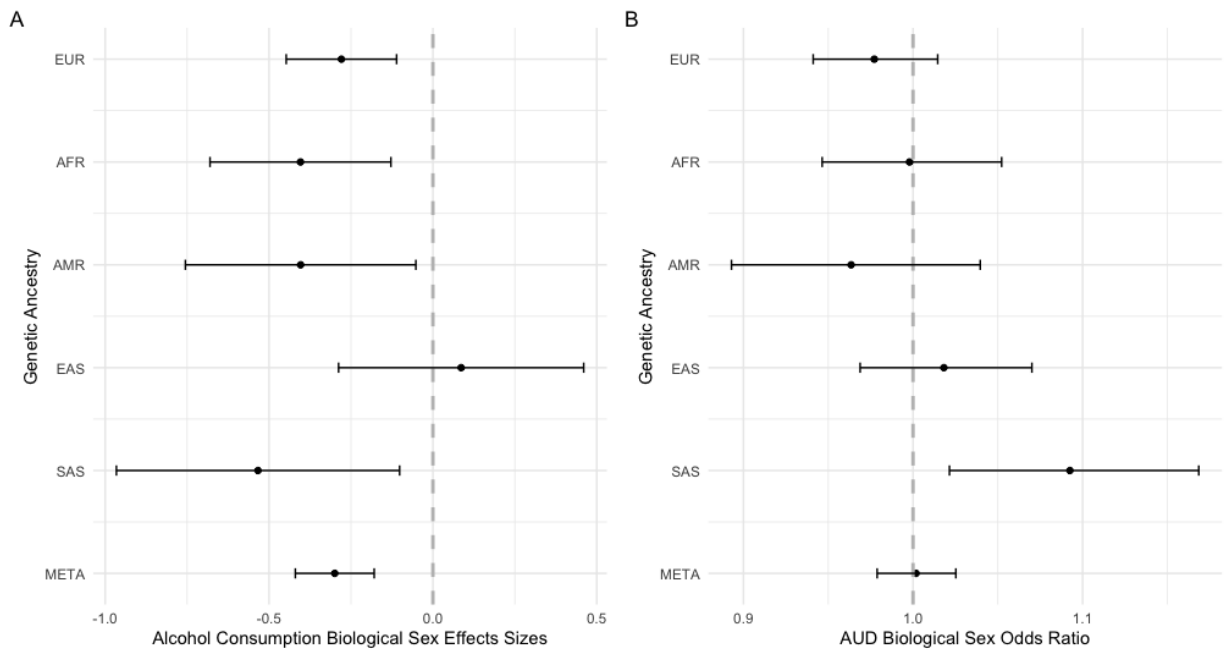

**Supplemental Figure 3: Effect of Biological Sex on Alcohol Behaviors Across Ancestries.** Forest plots showing the biological sex effect on A) alcohol consumption and B) alcohol use disorder (AUD) across ancestries and meta-analyzed (META).
